# Supplementary material for: Content and quality of physical activity ontologies: a systematic review
Source: PubMed Central journal article supplement (PMC10009987; doi:10.1186/s12966-023-01428-y), 2023-03-13
Supplement: 12966_2023_1428_MOESM1_ESM.pdf [file 12966_2023_1428_MOESM1_ESM.pdf]

## Search Strategy Web Of Science

(TS="physical\* near/3 ACTIV\*" OR TS="leisure activities" OR TS="exerc\*" OR TS="walk\*" OR TS="bicycling" OR TS="commut\*" OR TS="active transportation" OR TS="active travel" OR TS="sport\*" OR TS="fitness" OR TS="exertion" OR TS="functional movement" OR TS="sedentary" OR TS="motOR TS=activit\*" OR TS="physical condition\*" OR TS="physical endurance" OR TS="movement therap\*" )

**AND** (TS=ontolog\* )

**NOT** (TS="gene" OR TS="dna" OR TS="rna")
